# Supplementary material for: Synthesis of schafarzikite-type (PbBi)(Fe 1− x Mn x )O 4 : a study on structural, spectroscopic and thermogravimetric properties
Source: publisher site journal article supplement (doi:10.1515/zkri-2025-0023), 2025-06-23
Supplement: Supplementary file 2 [file j_zkri-2025-0023_suppl_001.docx]

**Supplementary Information**

**Synthesis of schafarzikite-type (PbBi)(Fe1-*x*Mn*x*)O4: a study on structural, spectroscopic and thermogravimetric properties**

Carla M. Uribe1, Thorsten M. Gesing1,2 M. Mangir Murshed1,2*

1University of Bremen, Institute of Inorganic Chemistry and Crystallography, Leobener Straße 7, D-28359 Bremen, Germany

2University of Bremen, MAPEX Center for Materials and Processes, Bibliothekstraße 1, Universität Bremen, D-28359 Bremen, Germany

*Corresponding author: murshed@uni-bremen.de,

ORCID:

CMUR: 0009-0008-8486-6376

TMG: 0000-0002-4119-2219

MMM: 0000-0002-9063-372X

**Table S1:** X-ray powder diffraction data Rietveld refined metric parameters of(PbBi)(Fe1-*x*Mn*x*)O4 in the space group *P*42/*mbc*, where the R-factors are given in %.

| Atom | Site | Occupancy | *x* | *y* | *z* | *B*/ 104pm2 |
| --- | --- | --- | --- | --- | --- | --- |
| (PbBi)FeO4, Rwp = 6.3, Rp = 4.7, GOF = 2.1 | | | | | | |
| Pb1/Bi1 | 8*h* | 0.5/0.5  0.48(5)/0.52(5)† | 0.15463(16) | 0.1570(16) | 0 | 0.73(1) |
| Fe | 4*d* | 1 | 0 | ½ | ¼ | 0.20(6) |
| O1 | 8*g* | 1 | 0.66870(8) | 0.16870(8) | ¼ | 2.05(2) ‡ |
| O2 | 8*h* | 1 | 0.08918(13) | 0.6313(12) | 0 | 2.05(2) ‡ |
| (PbBi)(Fe0.9Mn0.1)O4, Rwp = 6.3, Rp = 4.8, GOF = 2.1 | | | | | | |
| Pb1/Bi1 | 8*h* | 0.5/0.5  0.49(5)/0.51(5) † | 0.15463(16) | 0.1570(16) | 0 | 0.50(1) |
| Fe1/Mn1 | 4*d* | 0.9/0.1  0.90(3)/0.10(3) † | 0 | ½ | ¼ | 0.20(6) |
| O2 | 8*g* | 1 | 0.66870(8) | 0.16870(8) | ¼ | 0.99(18) ‡ |
| O2 | 8*h* | 1 | 0.08918(12) | 0.6313(11) | 0 | 0.99(18)‡ |
| (PbBi)(Fe0.8Mn0.2)O4, Rwp = 6.3, Rp = 4.8, GOF = 1.9 | | | | | | |
| Pb1/Bi1 | 8*h* | 0.5/0.5  0.48(5)/0.52(6) † | 0.15463(15) | 0.1570(15) | 0 | 0.82(1) |
| Fe1/Mn1 | 4*d* | 0.8/0.2  0.79(4)/0.21(3) † | 0 | ½ | ¼ | 0.20(6) |
| O2 | 8*g* | 1 | 0.66868(7) | 0.16868(7) | ¼ | 1.30(2) ‡ |
| O2 | 8*h* | 1 | 0.08919(11) | 0.63125(10) | 0 | 1.30(2) ‡ |
| (PbBi)(Fe0.7Mn0.3)O4, Rwp = 5.9, Rp = 4.5, GOF = 1.8 | | | | | | |
| Pb1/Bi1 | 8*h* | 0.5/0.5  0.49(6)/0.51(6) † | 0.15463(15) | 0.1570(15) | 0 | 0.65(1) |
| Fe1/Mn1 | 4*d* | 0.7/0.3  0.70(4)/0.30(4) † | 0 | ½ | ¼ | 0.20(5) |
| O2 | 8*g* | 1 | 0.6687(7) | 0.1687(7) | ¼ | 1.29(16)‡ |
| O2 | 8*h* | 1 | 0.0902(10) | 0.63124(10) | 0 | 1.29(16) ‡ |
| (PbBi)(Fe0.6Mn0.4)O4, Rwp = 7.5, Rp = 5.8, GOF = 2.1 | | | | | | |
| Pb1/Bi1 | 8*h* | 0.5/0.5  0.49(6)/0.51(6) † | 0.15463(2) | 0.1570(2) | 0 | 0.20(1) |
| Fe1/Mn1 | 4*d* | 0.6/0.4  0.59(3)/0.41(3) † | 0 | ½ | ¼ | 0.20(7) |
| O2 | 8*g* | 1 | 0.6687(9) | 0.1687(9) | ¼ | 1.04(2)‡ |
| O2 | 8*h* | 1 | 0.08918(15) | 0.6313(14) | 0 | 1.04(2)‡ |
| (PbBi)(Fe0.5Mn0.5)O4, Rwp = 6.2, Rp = 4.7, GOF = 1.9 | | | | | | |
| Pb1/Bi1 | 8*h* | 0.5/0.5  0.49(6)/0.51(6) † | 0.1546(1) | 0.1570(1) | 0 | 0.82(1) |
| Fe1/Mn1 | 4*d* | 0.5/0.5  0.49(3)/0.51(3) † | 0 | ½ | ¼ | 0.20(5) |
| O2 | 8*g* | 1 | 0.6687(8) | 0.1687(7) | ¼ | 1.82(17) ‡ |
| O2 | 8*h* | 1 | 0.08918(11) | 0.63072(11) | 0 | 1.82(17) ‡ |
| (PbBi)(Fe0.4Mn0.6)O4, Rwp = 6.4, Rp = 4.8, GOF = 1.9 | | | | | | |
| Pb1/Bi1 | 8*h* | 0.5/0.5  0.49(5)/0.51(5) † | 0.1546(2) | 0.1570(1) | 0 | 0.92(1) |
| Fe1/Mn1 | 4*d* | 0.4/0.6  0.38(3)/0.62(3) † | 0 | ½ | ¼ | 0.20(6) |
| O2 | 8*g* | 1 | 0.6687(7) | 0.1687(7) | ¼ | 1.47(17)‡ |
| O2 | 8*h* | 1 | 0.0891(11) | 0.6312(11) | 0 | 1.47(17)‡ |
| (PbBi)(Fe0.3Mn0.7)O4, Rwp = 7.4, Rp = 5.3, GOF = 2.1 | | | | | | |
| Pb1/Bi1 | 8*h* | 0.5/0.5  0.49(5)/0.51(5) † | 0.1546(2) | 0.1570(2) | 0 | 0.84(1) |
| Fe1/Mn1 | 4*d* | 0.3/0.7  0.30(3)/0.70(3) † | 0 | ½ | ¼ | 0.20(6) |
| O2 | 8*g* | 1 | 0.6686(9) | 0.1686(9) | ¼ | 2.06(21)‡ |
| O2 | 8*h* | 1 | 0.0891(14) | 0.6312(13) | 0 | 2.06(21)‡ |
| (PbBi)(Fe0.2Mn0.8)O4, Rwp = 7.0, Rp = 5.2, GOF = 2.0 | | | | | | |
| Pb1/Bi1 | 8*h* | 0.5/0.5  0.49(5)/0.51(5) † | 0.1541(2) | 0.1569(2) | 0 | 0.94(1) |
| Fe1/Mn1 | 4*d* | 0.2/0.8  0.22(3)/0.78(3) † | 0 | ½ | ¼ | 0.20(6) |
| O2 | 8*g* | 1 | 0.6686(8) | 0.1686(8) | ¼ | 2.31(20) ‡ |
| O2 | 8*h* | 1 | 0.0892(13) | 0.6312(11) | 0 | 2.31(20) ‡ |
| (PbBi)(Fe0.1Mn0.9)O4, Rwp = 8.8, Rp = 6.7, GOF = 2.2 | | | | | | |
| Pb1/Bi1 | 8*h* | 0.5/0.5  0.49(5)/0.51(5) † | 0.1545(2) | 0.1570(2) | 0 | 0.20(2) |
| Fe1/Mn1 | 4*d* | 0.1/0.9  0.09(3)/0.91(3) † | 0 | ½ | ¼ | 0.20(9) |
| O2 | 8*g* | 1 | 0.6687(12) | 0.1687(12) | ¼ | 2.58(31) ‡ |
| O2 | 8*h* | 1 | 0.0891(19) | 0.6313(18) | 0 | 2.58(31) ‡ |
| (PbBi)MnO4, Rwp = 8.7, Rp = 6.4, GOF = 2.4 | | | | | | |
| Pb1/Bi1 | 8*h* | 0.5/0.5  0.49(5)/0.51(5) † | 0.1546(2) | 0.1562(2) | 0 | 0.56(2) |
| Mn1 | 4*d* | 1 | 0 | ½ | ¼ | 0.20(8) |
| O2 | 8*g* | 1 | 0.6687(11) | 0.1658(11) | ¼ | 3.15(29)‡ |
| O2 | 8*h* | 1 | 0.0891(18) | 0.6247(17) | 0 | 3.15(29)‡ |

†Compositional values form ten point-measurement and three mappings of each sample on SEM-EDX with the corresponding standard deviation.

‡Constrains of isotropic displacement parameter for a physically meaningful convergence.

**Table S2:** Metric parameters, averaged crystalline size (LVol(IB)) and macrostrain (ε0) of (PbBi)(Fe1-xMnx)O4.

| **PbLMO4** | ***a*  /pm** | ***c*  /pm** | ***V*  /106 pm3** | ***L*Vol(IB)**  **/nm** | ***0* /10-6** |
| --- | --- | --- | --- | --- | --- |
| (PbBi)FeO4 | 850.08(3) | 610.75(4) | 441.35(4) | 206(2) | 180(2) |
| (PbBi)(Fe0.9Mn0.1)O4 | 850.51(4) | 610.73(4) | 441.78(5) | 199(2) | 200(2) |
| (PbBi)(Fe0.8Mn0.2)O4 | 850.84(8) | 610.07(5) | 441.65(7) | 126(6) | 130(2) |
| (PbBi)(Fe0.7Mn0.3)O4 | 851.19(5) | 609.47(5) | 441.58(6) | 135(7) | 160(2) |
| (PbBi)(Fe0.6Mn0.4)O4 | 851.57(5) | 609.02(5) | 441.65(6) | 135(9) | 170(2) |
| (PbBi)(Fe0.5Mn0.5)O4 | 851.88(4) | 608.27(4) | 441.42(5) | 204(2) | 180(2) |
| (PbBi)(Fe0.4Mn0.6)O4 | 851.94(5) | 607.83(4) | 441.16(6) | 167(2) | 170(2) |
| (PbBi)(Fe0.3Mn0.7)O4 | 852.11(5) | 607.48(5) | 441.09(6) | 132(7) | 150(2) |
| (PbBi)(Fe0.2Mn0.8)O4 | 852.14(5) | 606.97(5) | 440.75(6) | 132(6) | 120(2) |
| (PbBi)(Fe0.1Mn0.9)O4 | 852.62(5) | 606.50(5) | 440.90(6) | 87(4) | 110(2) |
| (PbBi)MnO4 | 852.60(5) | 606.32(8) | 440.76(7) | 182(2) | 180(2) |

**Table S3:** Interatomic bond distances /pm, angles /°.

| **Compound** | ***M*-O1 x2** | ***M*-O2 x4** | ***L*-O1 x2** | ***L*-O2** | ***L*-O2** |
| --- | --- | --- | --- | --- | --- |
| (PbBi)FeO4 | 202.8(1) | 203.8(7) | 213.1(4) | 218.9(11) | 274.5(11) |
| (PbBi)(Fe0.9Mn0.1)O4 | 202.9(9) | 203.8(6) | 213.1(4) | 219.0(10) | 274.6(10) |
| (PbBi)(Fe0.8Mn0.2)O4 | 203.0(9) | 203.7(6) | 213.1(4) | 219.1(10) | 274.8(9) |
| (PbBi)(Fe0.7Mn0.3)O4 | 203.1(9) | 203.9(6) | 213.0(4) | 218.3(9) | 275.5(9) |
| (PbBi)(Fe0.6Mn0.4)O4 | 203.2(12) | 203.6(8) | 213.0(5) | 219.3(13) | 275.0(12) |
| (PbBi)(Fe0.5Mn0.5)O4 | 293.2(6) | 203.2(6) | 212.9(4) | 219.4(10) | 275.4(10) |
| (PbBi)(Fe0.4Mn0.6)O4 | 203.3(9) | 203.4(6) | 212.8(4) | 219.4(10) | 275.1(10) |
| (PbBi)(Fe0.3Mn0.7)O4 | 203.3(10) | 203.3(7) | 212.8(5) | 219.4(12) | 275.2(12) |
| (PbBi)(Fe0.2Mn0.8)O4 | 203.3(10) | 203.2(7) | 212.7(5) | 229.8(11) | 274.9(11) |
| (PbBi)(Fe0.1Mn0.9)O4 | 203.4(15) | 203.2(11) | 212.7(7) | 219.6(16) | 275.2(16) |
| (PbBi)MnO4 | 200.0(7) | 200.2(7) | 214.6(7) | 220.1(16) | 279.4(9) |
|  | **O1-*M*-O1** | **O1-*M*-O2 x4** | **O2-*M*-O2**  **x4** | **O1-*L*-O1** | **O1-*L*-O2**  **x2** |
| **O2-*L*-O2** |
| (PbBi)FeO4 | 180.0(2) | 82.9(3) | 82.9(3) | 91.5(2) | 65.6(3) |
| 97.1(3) | 98.9(5) | 144.8(2) | 90.8(3) |
| (PbBi)(Fe0.9Mn0.1)O4 | 180.0(3) | 82.9(3) | 83.0(4) | 91.5(2) | 65.6(3) |
| 97.1(3) | 98.8(4) | 144.8(2) | 90.8(2) |
| (PbBi)(Fe0.8Mn0.2)O4 | 180.0(3) | 82.9(3) | 82.9(3) | 91.4(2) | 65.5(2) |
| 97.1(3) | 98.8(4) | 144.8(2) | 91.4(2) |
| (PbBi)(Fe0.7Mn0.3)O4 | 180.0(1) | 83.0(3) | 83.3(4) | 91.3(2) | 65.6(2) |
| 97.0(3) | 98.4(4) | 144.9(2) | 90.8(2) |
| (PbBi)(Fe0.6Mn0.4)O4 | 179.9(1) | 82.8(3) | 83.2(5) | 91.3(3) | 65.5(3) |
| 97.2(3) | 98.6(5) | 144.8(3) | 90.8(3) |
| (PbBi)(Fe0.5Mn0.5)O4 | 180.0(2) | 82.9(3) | 83.1(4) | 90.9(2) | 65.4(2) |
| 97.1(3) | 98.6(4) | 144.8(2) | 91.2(2) |
| (PbBi)(Fe0.4Mn0.6)O4 | 179.9(3) | 82.8(3) | 83.3(4) | 90.8(2) | 65.5(2) |
| 97.2(3) | 98.5(4) | 144.8(2) | 91.1(2) |
| (PbBi)(Fe0.3Mn0.7)O4 | 180.0(1) | 82.8(3) | 83.3(3) | 80.8(3) | 65.5(3) |
| 97.2(3) | 98.4(5) | 144.8(2) | 91.1(3) |
| (PbBi)(Fe0.2Mn0.8)O4 | 180.0(1) | 82.8(3) | 83.4(4) | 90.7(3) | 62.5(3) |
| 97.2(3) | 98.4(5) | 144.7(2) | 91.0(2) |
| (PbBi)(Fe0.1Mn0.9)O4 | 179.9(5) | 82.8(4) | 83.5(7) | 90.8(4) | 65.5(4) |
| 97.2(4) | 98.3(7) | 144.7(3) | 91.0(4) |
| (PbBi)MnO4 | 180.0(1) | 81.5(1) | 83.8(1) | 89.8(1) | 63.9(1) |
| 96.1(1) | 99.8(1) | 145.1(5) | 92.4(1) |

**Table S4:** Irreducible representations for the nonequivalent atomic sites for the 42/mbc space group of L2MO4 with two formula units per unit cell.

| **Atom** | **Wyckoff** | **Irreducible representation** |
| --- | --- | --- |
| *M* | 4*d* | A2g + A2u + B1g + B1u + 2Eu + 2Eg |
| *L* | 8*h* | 2A1g + A1u + 2A2g + A2u + 2B1g + B1u + 2B2g + B2u + 4Eu + 2Eg |
| O1 | 8*g* | A1g + A1u + 2A2g + 2A2u + 2B1g + 2B1u + 1B2g + B2u + 3Eu + 3Eg |
| O2 | 8*h* | 2A1g + A1u + 2A2g + A2u + 2B1g + B1u + 2B2g + B2u + 4Eu + 2Eg |
| GRaman: 5A1g + 7B1g + 5B2g + 9Eg  GIR: 4A2u + 12Eu  Gacoustic: A2u + Eu  Gsilent: 3A1u + 7A2g+ 5B1u + 3B2u | | |

**Table S5:** Band-gap energies of the (PbBi)(Fe1-xMnx)O4 solid solution calculated from the UV/Vis diffuse reflectance spectra using Tauc’s and DASF methods.

| **PbBiFe1-xMnxO₄** | **(h*v**F(*R*))½**  **/eV** | **(h*v**F(*R*))²**  **/eV** | **DASF**  ***Eg* /eV** | **DASF**  ***Fg* /eV** | **Assigned  type** |
| --- | --- | --- | --- | --- | --- |
| PbBiFeO₄ | 1.95(3) | 2.23(3) | 2.24(1) | 0.32(2) | Direct |
| PbBiFe₀․₉Mn₀․₁O₄ | 1.95(3) | 2.23(3) | 2.24(2) | 0.32(5) | Direct |
| PbBiFe₀․₈Mn₀․₂O₄ | 1.54(3) | 1.78(3) | 1.77(2) | 0.29(4) | Direct |
| PbBiFe₀․₇Mn₀․₃O₄ | 1.62(3) | 1.82(3) | 1.75(1) | 0.29(4) | Direct |
| PbBiFe₀․₆Mn₀․₄O₄ | 1.64(3) | 1.75(3) | 1.80(1) | 0.23(3) | Direct |
| PbBiFe₀․₅Mn₀․₅O₄ | 1.60(3) | 1.75(3) | 1.82(7) | 0.25(8) | Direct |
| PbBiFe₀․₄Mn₀․₆O₄ | 1.61(3) | 1.76(3) | 1.82(4) | 0.26(3) | Direct |
| PbBiFe₀․₃Mn₀․₇O₄ | 1.58(3) | 1.77(3) | 1.87(1) | 0.25(2) | Direct |
| PbBiFe₀․₂Mn₀․₈O₄ | 1.62(3) | 1.74(3) | 1.74(3) | 0.23(9) | Direct |
| PbBiFe₀․₉Mn₀․₁O₄ | 1.66(3) | 1.73(3) | 1.73(1) | 0.39(5) | Direct |
| PbBiMnO₄ | 1.79(3) | 1.72(3) | 1.72(1) | 0.46(8) | Direct |


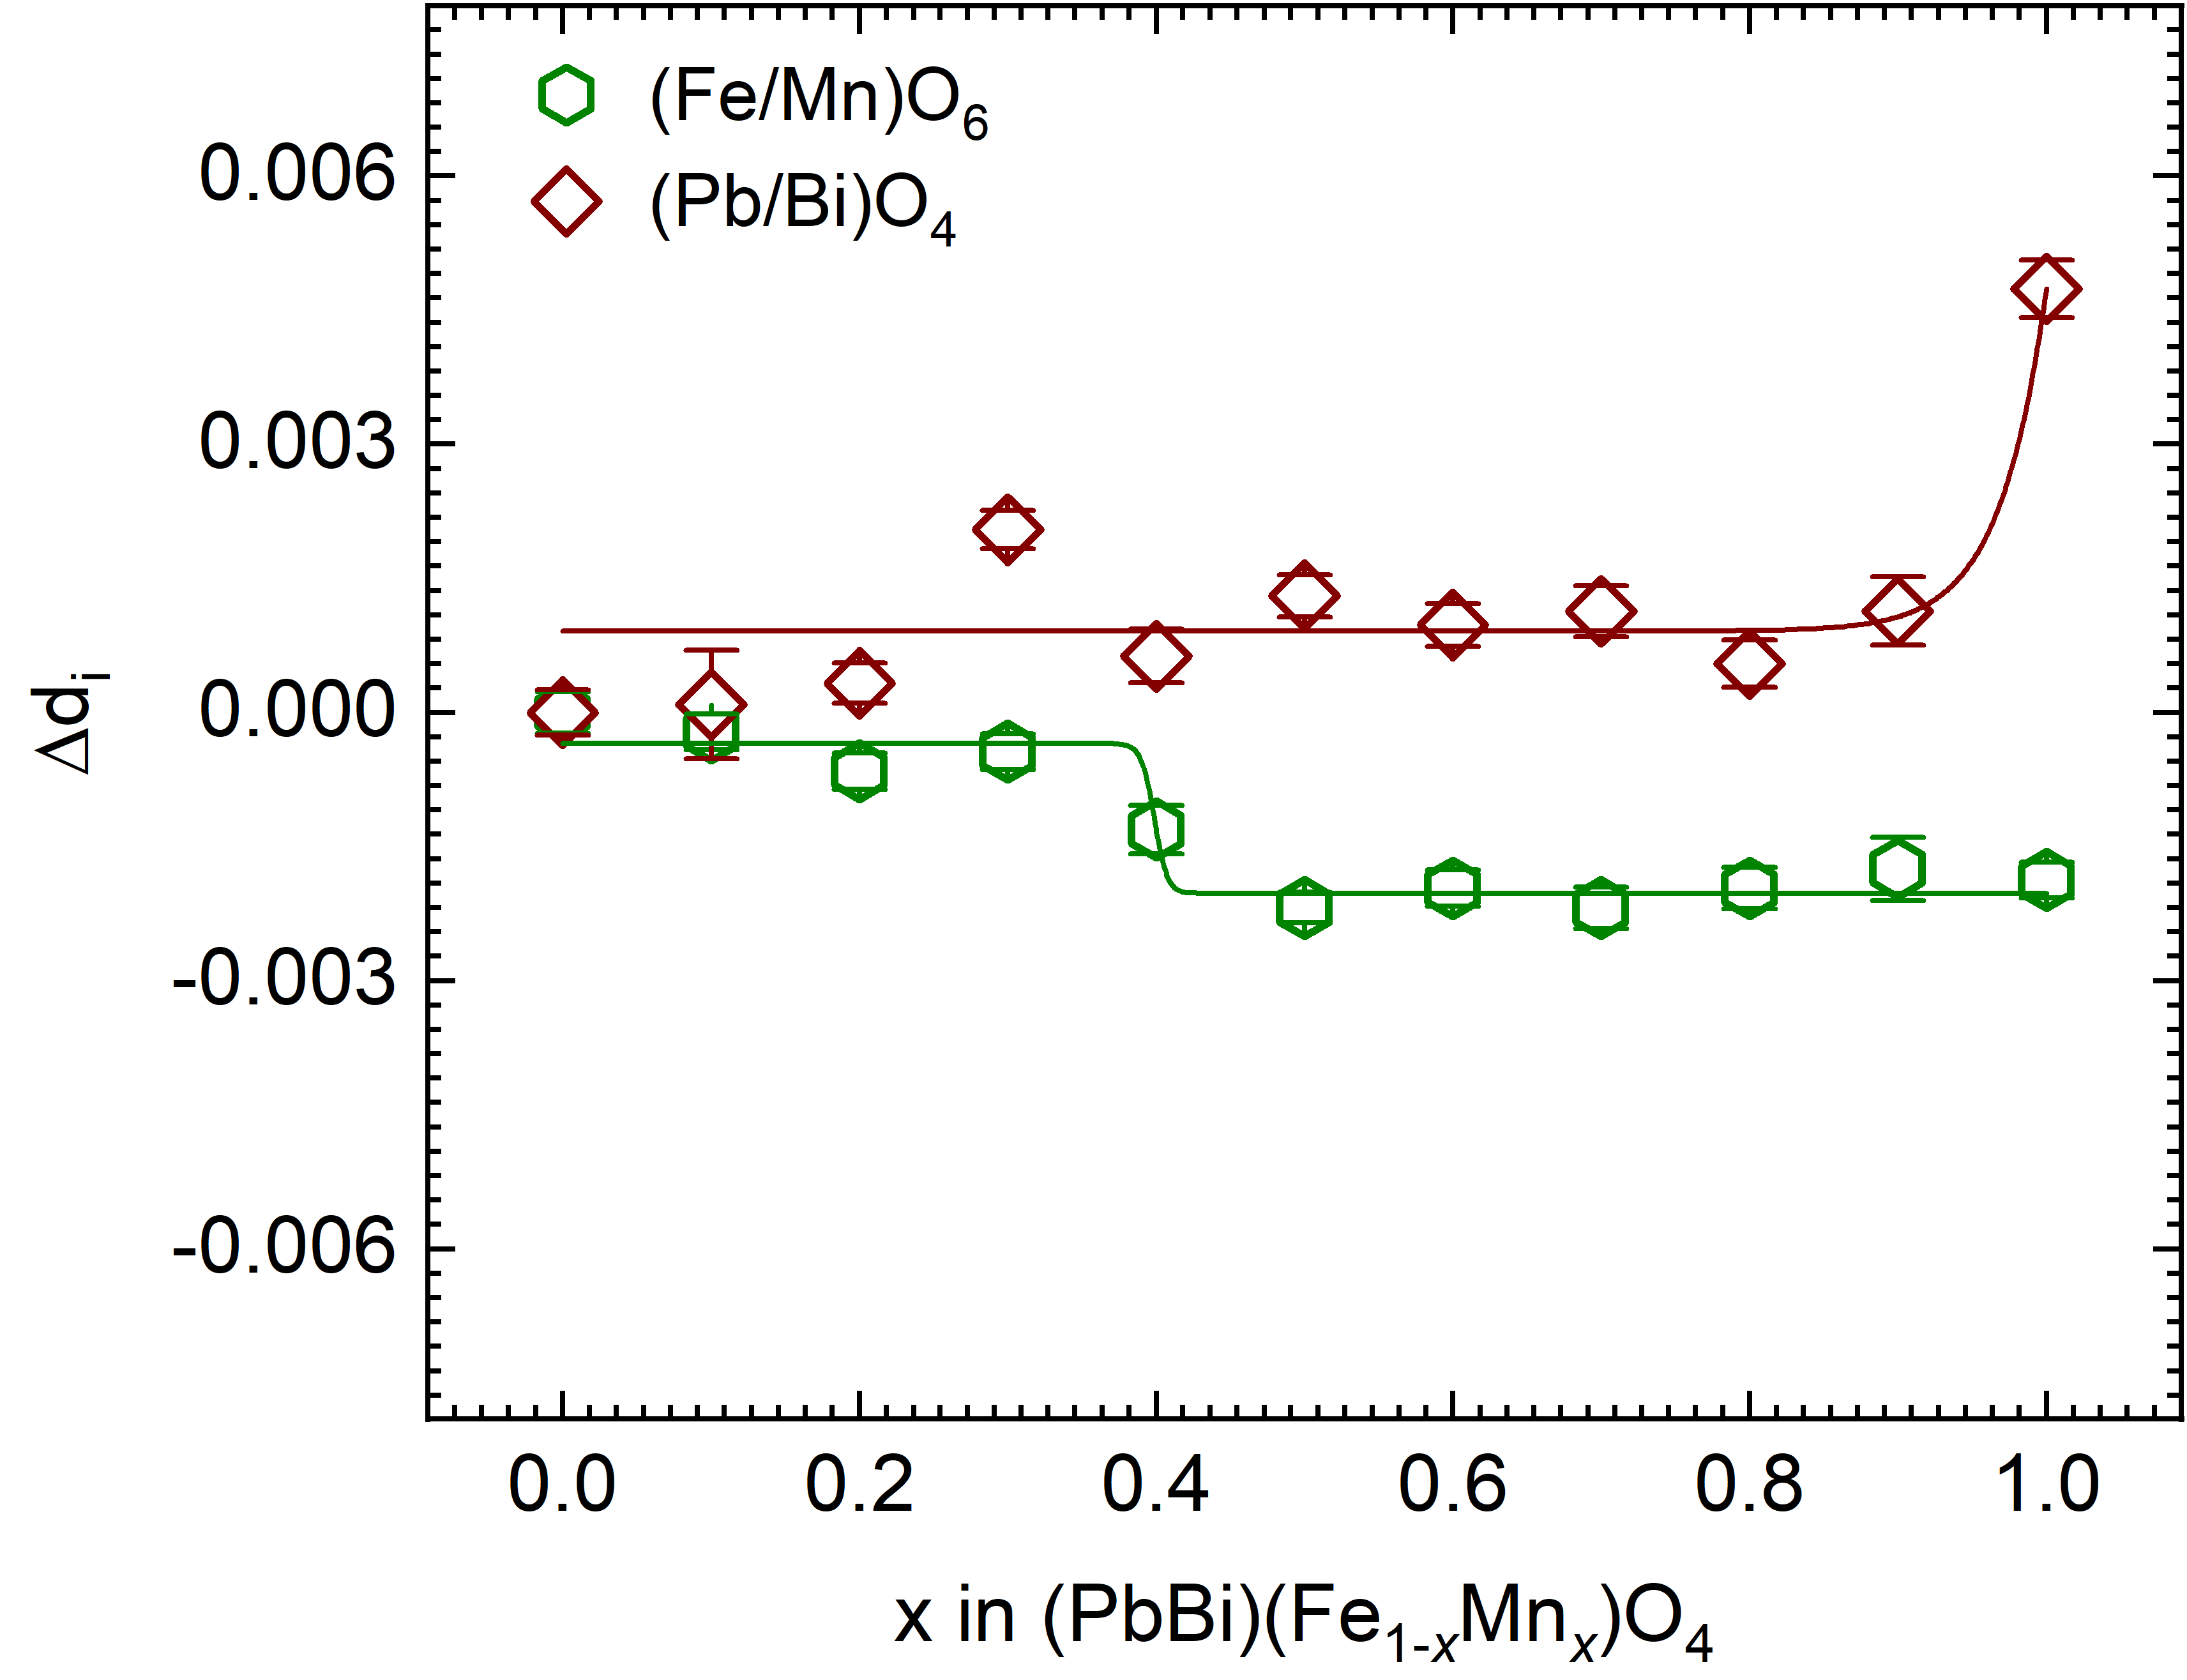


**Figure S1:** Deviationof the bond length distortion (Δdi) in the (Pb/Bi)O3 and (Fe/Mn)O6 polyhedra with respect to the chemical composition x in (PbBi)(Fe1-xMnx)O4. The solid lines are eye guidelines.


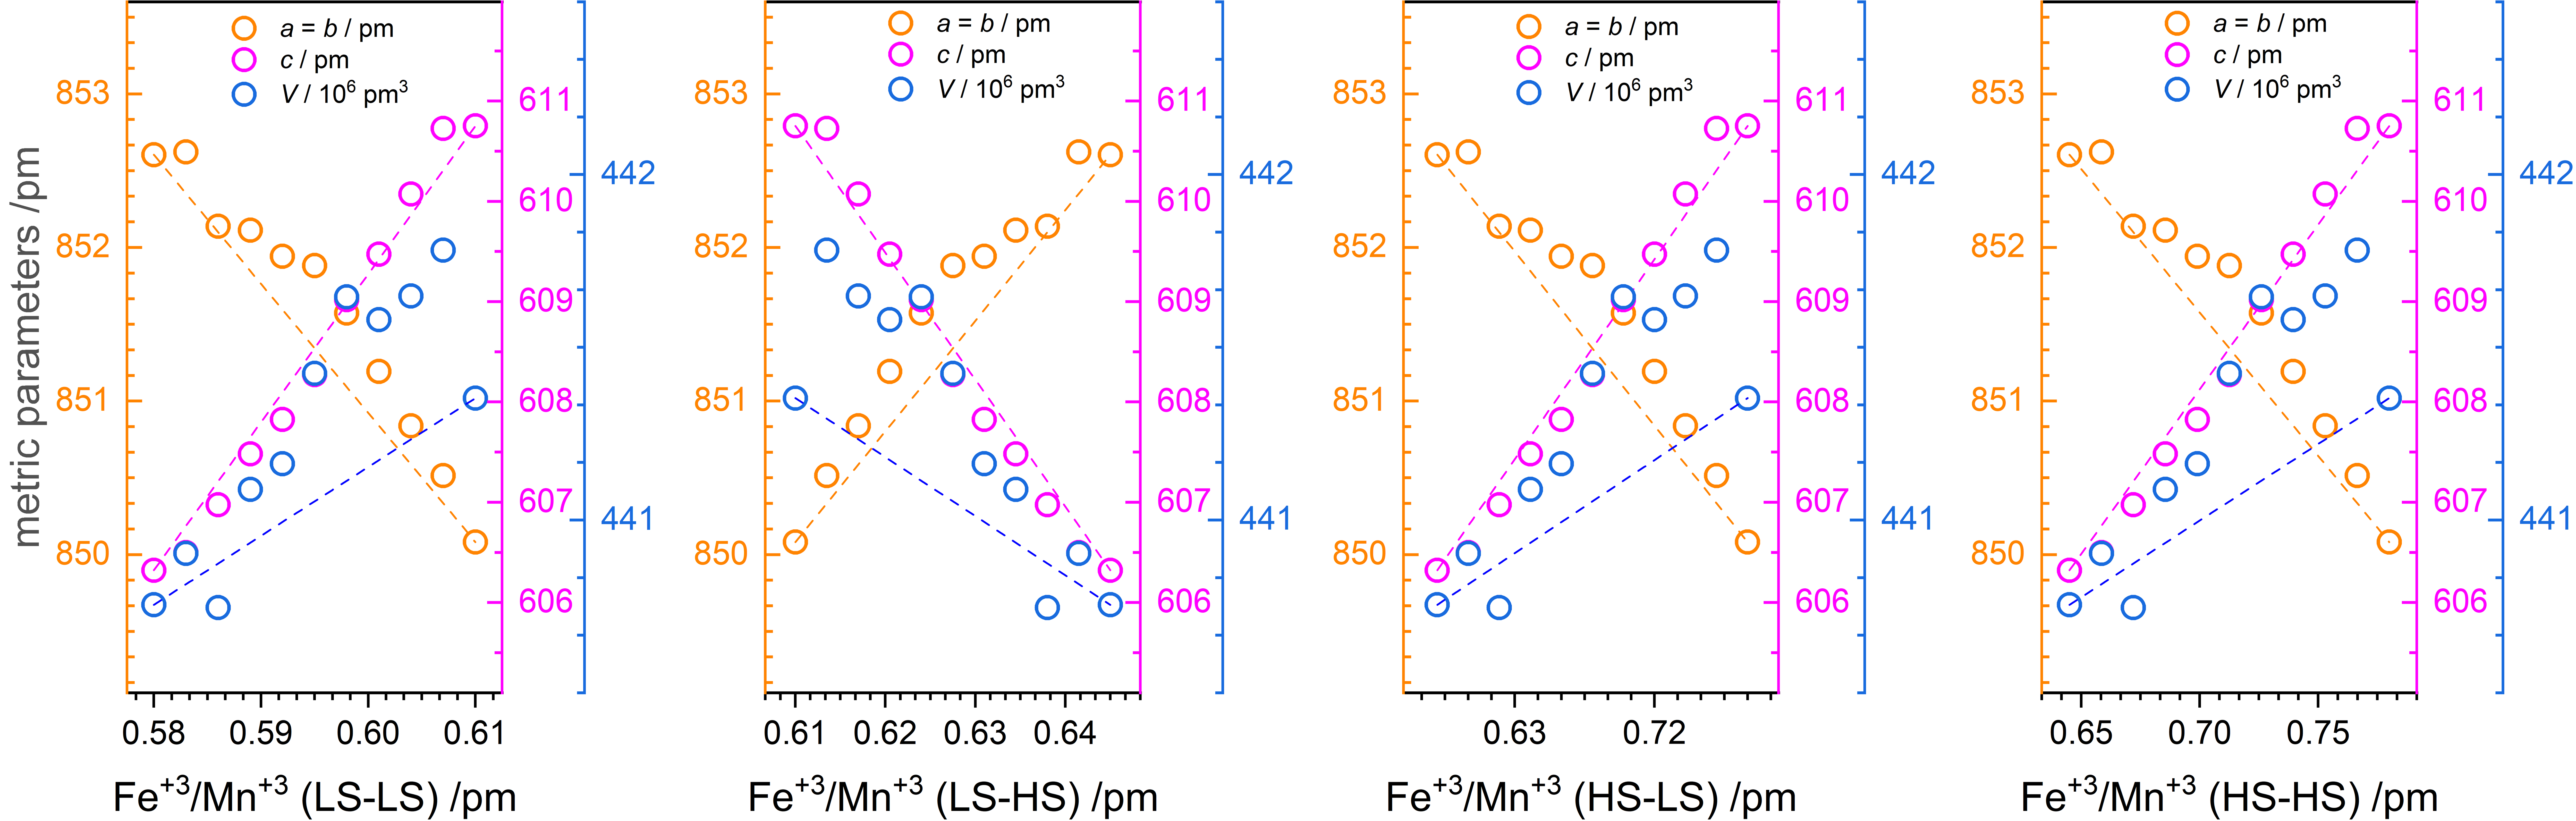


**Figure S2:** Low spin and high spin cationic radii of Fe+3 and Mn+3 in the corresponding concentrations vs lattice parameters.





**Figure S3:** Selective Raman spectroscopic peak shifts with respect to compositional x-value in (PbBi)(Fe1-xMnx)O4.





**Figure S4:** Selective FTIR spectroscopic peak shifts with respect to compositional x-value in (PbBi)(Fe1-xMnx)O4.


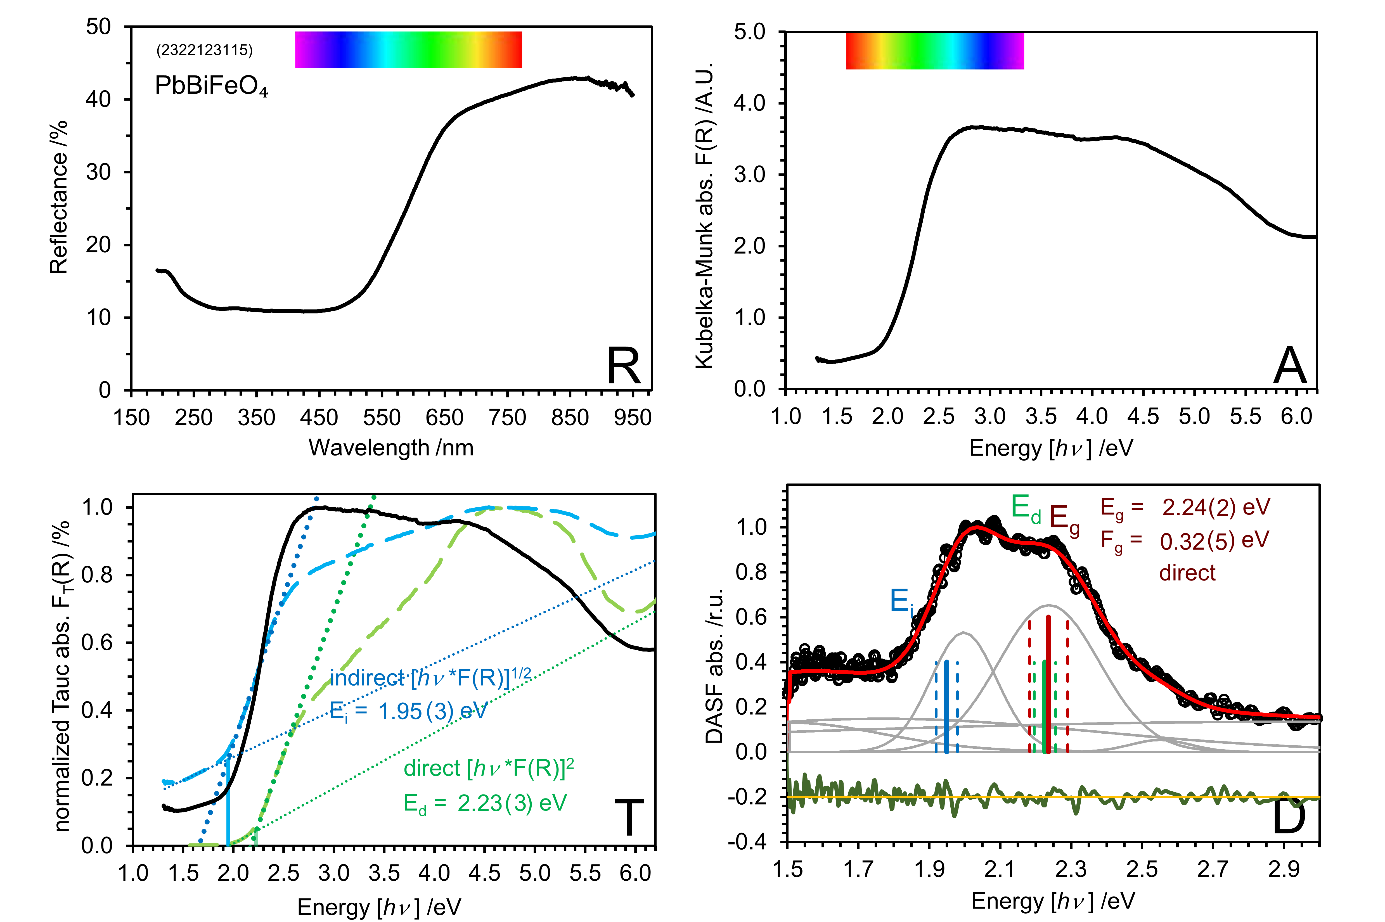


**Figure S5:** UV/Vis diffuse reflectance (R), Kubelka-Munk transformed absorption spectra (A), Tauc plots for indirect (Ei) and direct (Ed) band-gap transitions (T), and DASF plot (D) of (PbBi)FeO4.


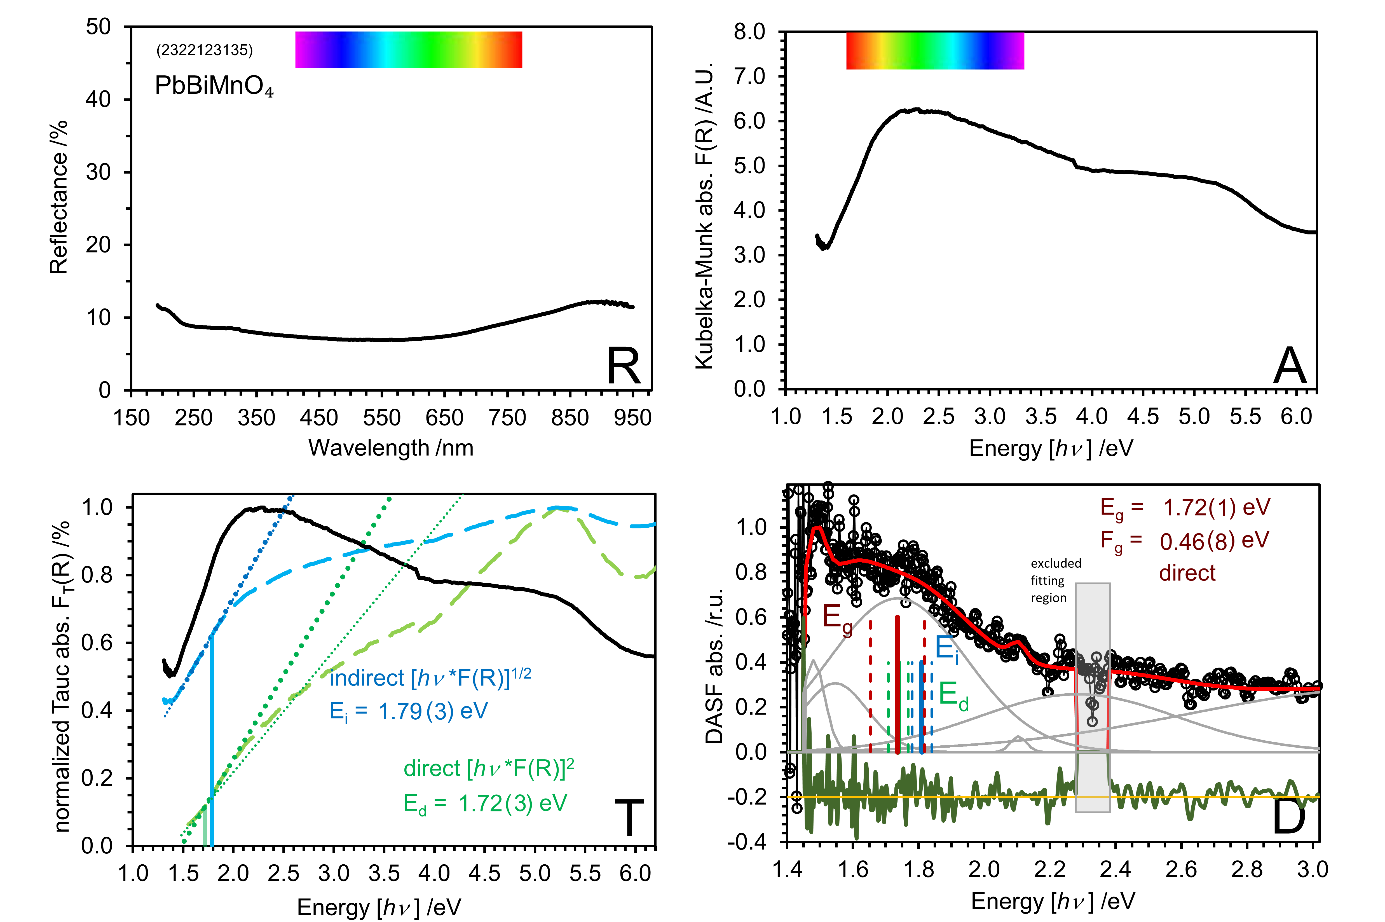


**Figure S6:** UV/Vis diffuse reflectance (R), Kubelka-Munk transformed absorption spectra (A), Tauc plots for indirect (Ei) and direct (Ed) bandgap transitions (T), and DASF plot (D) of (PbBi)MnO4 (bottom).


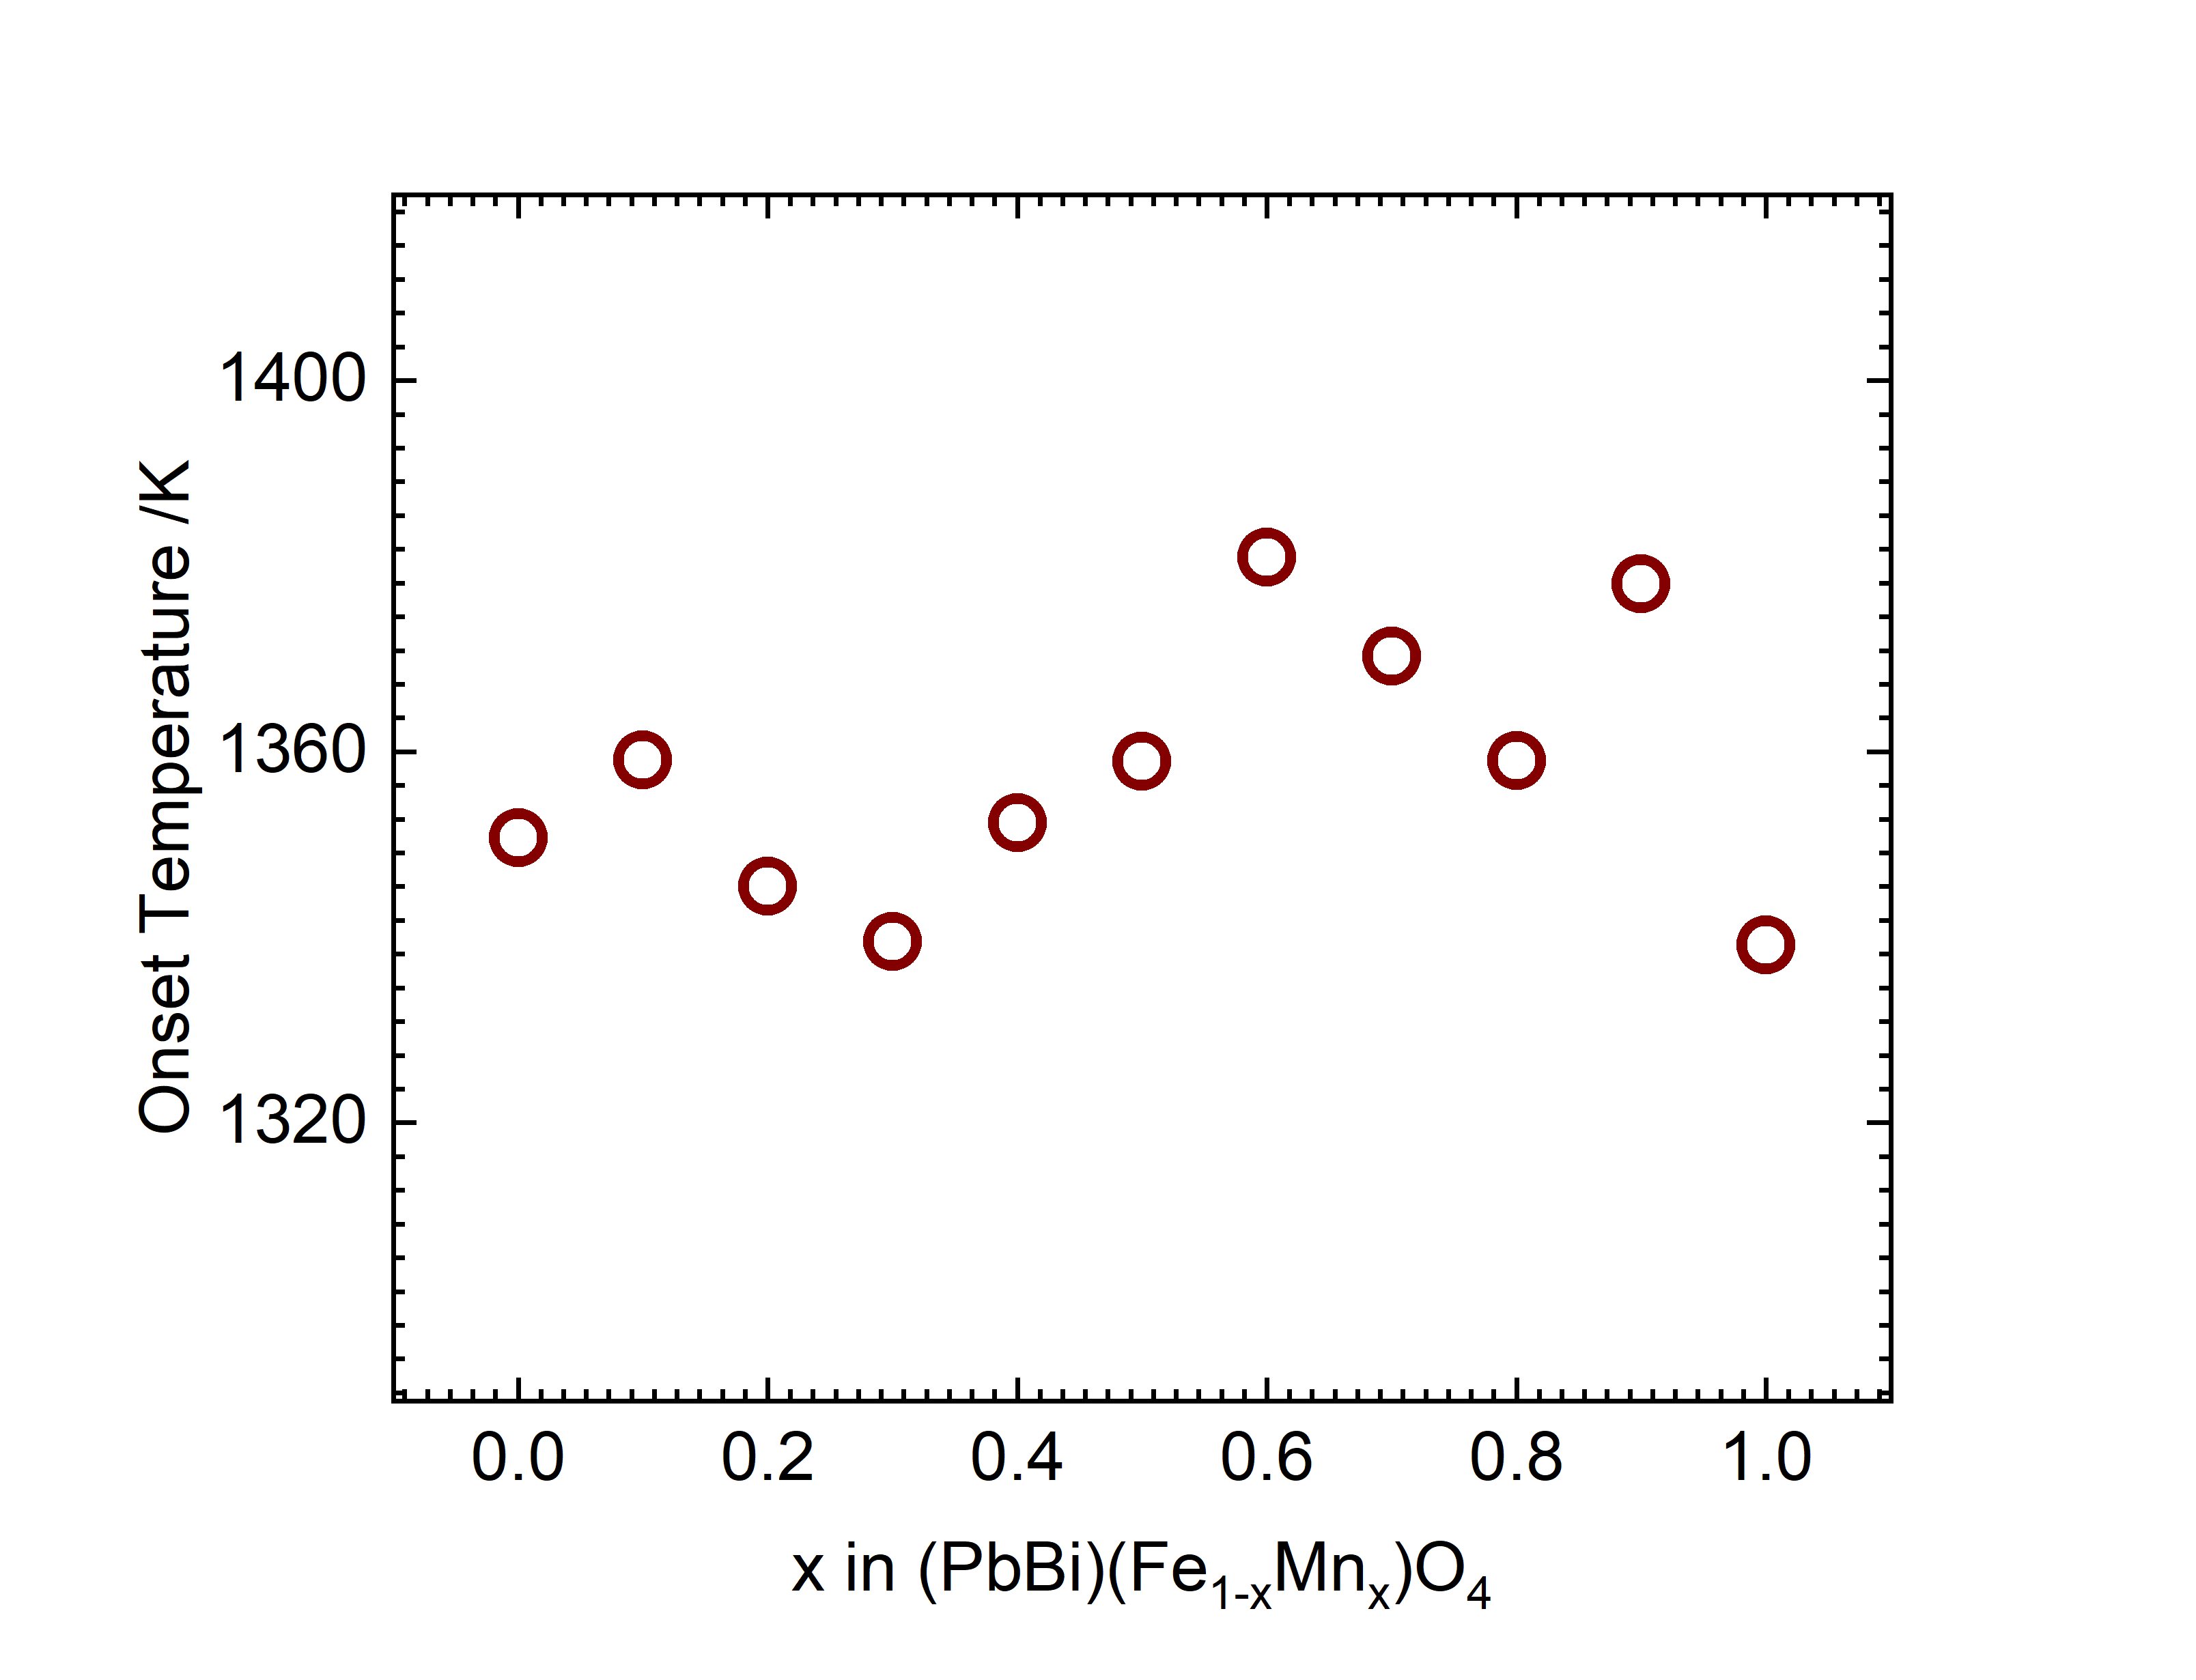


**Figure S7:** Decomposition temperature of (PbBi)(Fe1-xMnx)O4.
